# Supplementary material for: Towards the prediction of the transport properties of cluster-based molybdenum chalcogenides
Source: Royal Society of Chemistry journal article supplement (doi:10.1039/c7tc03977h), 2017-01-01
Supplement: c7tc03977h1.pdf [file c7tc03977h1.pdf]

## Supporting Information

### **Towards the Prediction of the Transport Properties of Cluster-Based Chalcogenides?**

Rabih Al Rahal Al Orabi, Benoît Boucher, Bruno Fontaine, Philippe Gall,  
Christophe Candolfi, Bertrand Lenoir, Patrick Gougeon, Jean-François Halet and  
Régis Gautier\*

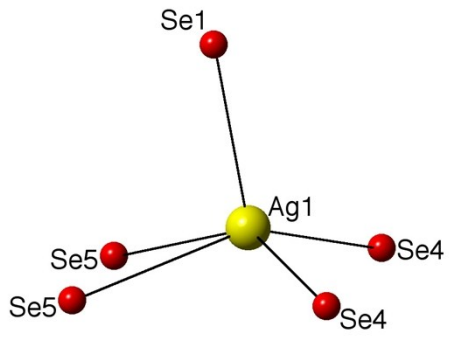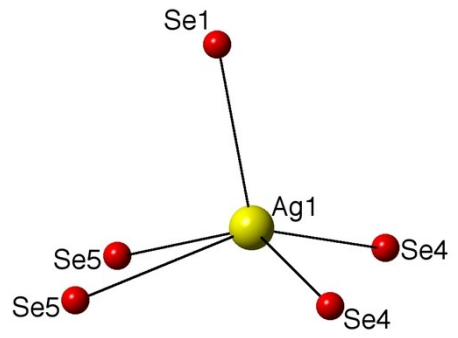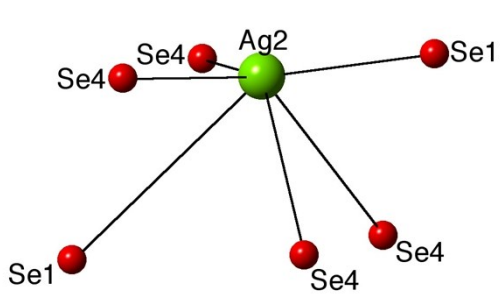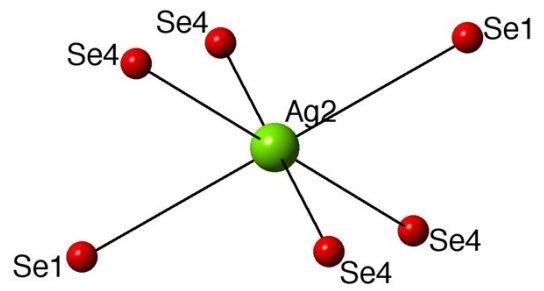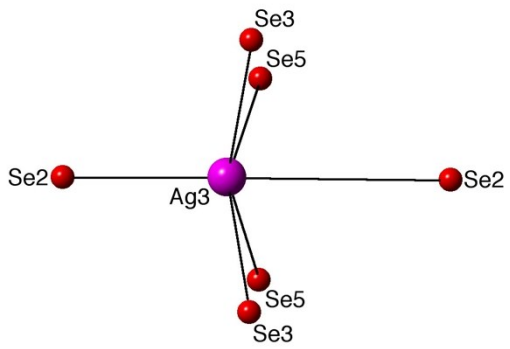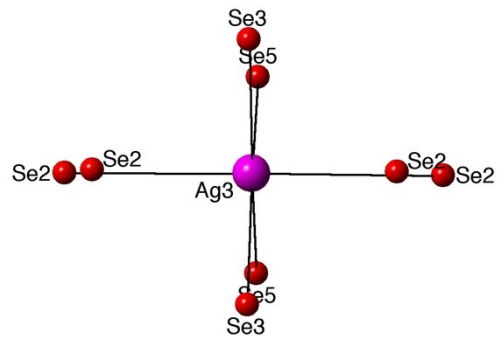

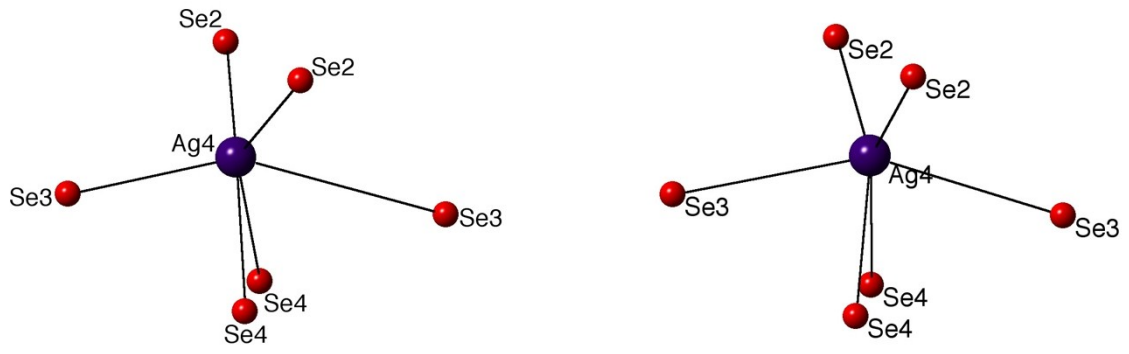

**Fig. S1** Environments of Ag atoms in the X-ray structure (left) and models (right).

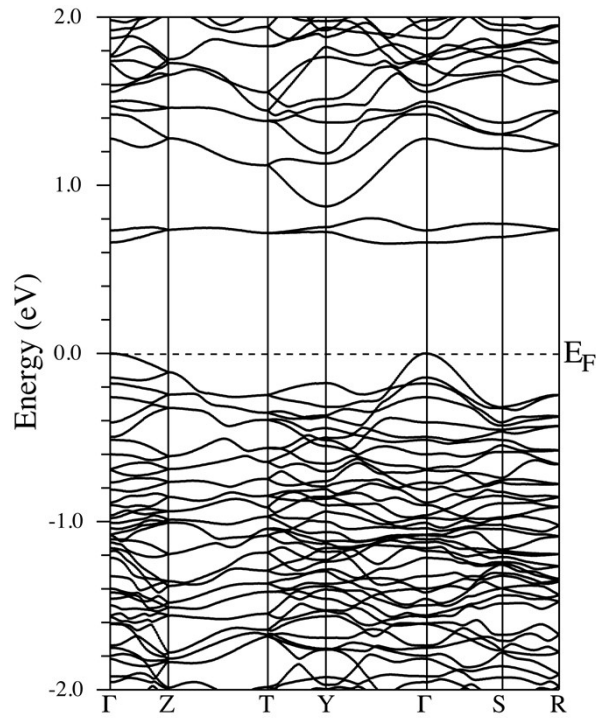

**Fig. S2** Band structure of the model **1** of  $\text{Ag}_4\text{Mo}_9\text{Se}_{11}$  computed using the mBJ functional and taking into account spin-orbit interaction.

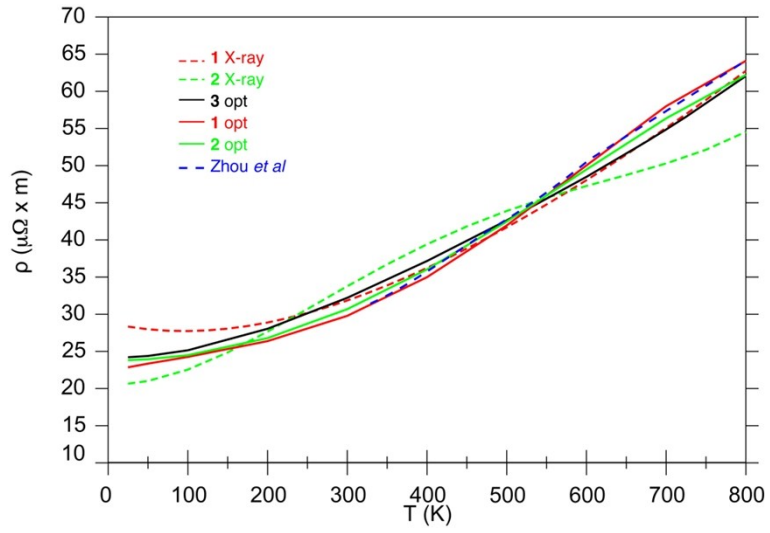

**Fig. S3** Electrical resistivity  $\rho$  vs  $T$  computed for  $\text{Ag}_4\text{Mo}_9\text{Se}_{11}$  models and compared with experimental measurements. The relaxation time is fitted in order that the averaged electrical conductivities resulting from measurements and BTE calculations match.

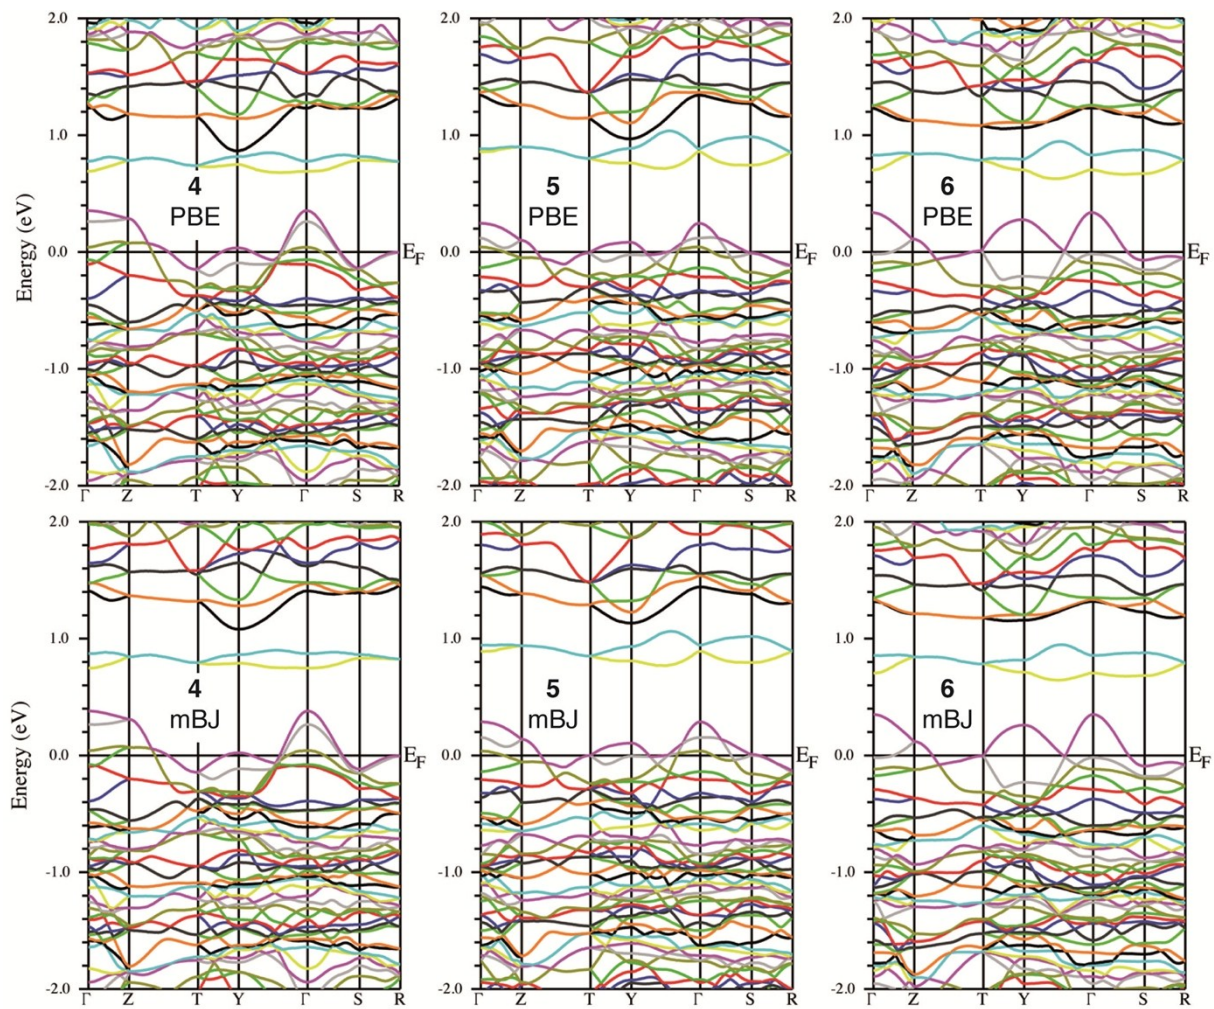

**Fig. S4** PBE and mBJ band structures of  $\text{Ag}_3\text{Mo}_9\text{Se}_{11}$  models.
